# Supplementary material
Source: PubMed Central journal article supplement (PMC6609540)

**A cholecystokinin receptor agonist (CCK-8) induces adiponectin production in rat white adipose tissue**

Adrián Plaza, Beatriz Merino, Nuria Del Olmo, and Mariano Ruiz-Gayo

Departamento de Ciencias Farmacéuticas y de la Salud. Facultad de Farmacia. Universidad CEU-San Pablo. Madrid, Spain.

*Author for correspondence:* Mariano Ruiz-Gayo  
Departamento de Ciencias Farmacéuticas y de la Salud  
Facultad de Farmacia. Universidad CEU-San Pablo  
Campus de Montepíncipe. Alcorcón  
28925 Madrid, Spain  
e-mail: [ruigayo@ceu.es](mailto:ruigayo@ceu.es)  
Tel: +34 913 724 700

**Short title:** Cholecystokinin promotes adiponectin production

**Disclosure statement:** The authors have nothing to disclose

**Funding:** Ministerio de Economía y Competitividad (BFU2012-35353, BFU2016-78556-R), European Regional Development Fund, and Fundación Universitaria San Pablo-CEU. A.P. is supported by a grant from Ministerio de Economía y Competitividad, Spain (BES-2013-063773).

**Table 1.-Effect of acute and chronic CCK-8 on plasma parameters.** Acute treatment with a single dose of CCK-8 (10µg/kg) had no effect on plasma levels of glucose, triglycerides (TG), non-esterified fatty acids (NEFA), insulin, leptin and total cholecystokinin immunoreactivity (CCK). Chronic CCK-8 treatment had no effect on plasma glucose and CCK, but reduced TG, NEFA insulin, and leptin levels.

|                        | Acute treatment |                  | Chronic treatment |                  |
|------------------------|-----------------|------------------|-------------------|------------------|
|                        | Saline          | CCK-8 (10 µg/kg) | Saline            | CCK-8 (10 µg/kg) |
| <b>Glucose (mg/dl)</b> | 110.5±3.4       | 110.8±2.3        | 101.9±4.0         | 90.9±2.6         |
| <b>TG (mg/dl)</b>      | 159.6±25.7      | 116.6±20.8       | 152.6±12.7        | 114.4±10.3*      |
| <b>NEFA (mg/dl)</b>    | 43.4±5.1        | 35.3±3.4         | 37.8±2.4          | 31.9±1.2*        |
| <b>Insulin (ng/ml)</b> | 0.77±0.13       | 0.83±0.18        | 1.85±0.24         | 0.92±0.14*       |
| <b>Leptin (ng/ml)</b>  | 2.3±0.5         | 4.1±1.2          | 0.87±0.1          | 0.26±0.1*        |
| <b>CCK (ng/ml)</b>     | 0.77±0.10       | 0.74±0.09        | 0.47±0.01         | 0.53±0.06        |

Values are means ± S.E.M. (n=6). \*P<0.05 compared to their respective saline control groups (Newman Keuls' test).

**This table has been already published in Plaza et al. 2018 (Plaza A, Merino B, Cano V, Domínguez G, Pérez-Castells J, Fernández-Alfonso MS, Sengenès C, Chowen JA & Ruiz-Gayo M 2018 Cholecystokinin is involved in triglyceride fatty acid uptake by rat adipose tissue. *Journal of Endocrinology* 236 137-150.**

**Figure 1. Effect of CCK-8 on adiponectin production in subcutaneous pre-adipocytes.**

Two-way ANOVA revealed an effect of pharmacological treatment ( $F_{(1,24)}=4.822$ ;  $P<0.05$ ) and time ( $F_{(2,24)}=13.59$ ;  $P<0.05$ ), without significant interaction CCK-8 x time. One-way ANOVA indicated only an effect of CCK-8 (ANOVA-1;  $F_{(2,12)}=8.739$ ,  $P<0.05$ ), that was significant 1h after CCK-8 withdrawal ( $P<0.05$ ). In contrast, adiponectin content remained unchanged during the assay in saline-treated cells (ANOVA-1;  $F_{(2,12)}=3.059$ ,  $P=0.084$ ).

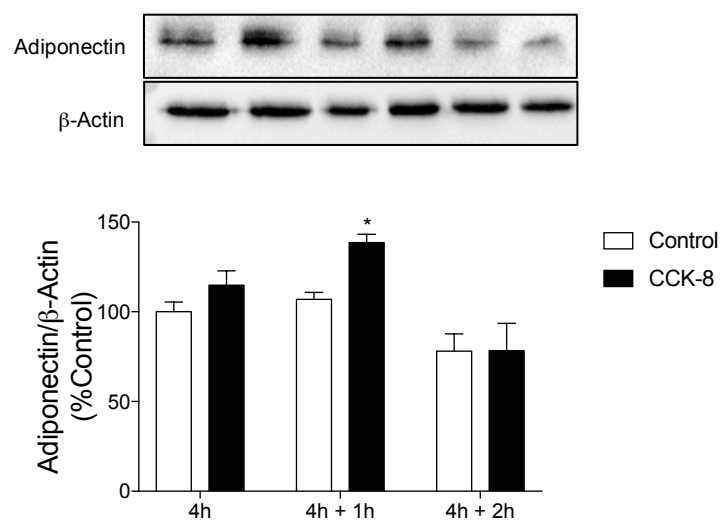

**Figure 2: Effect of CCK-8 on the expression of IL1b, IL6, IL10 and TNF $\alpha$**

Acute treatment with CCK-8 suppressed the expression of *Il6* ( $t_{(8)}=3.277$ ;  $P<0.05$ ) and up-regulated *Il10* expression ( $t_{(8)}=2.983$ ;  $P<0.05$ ) in Vis-WAT, whereas chronic CCK-8 repressed the *Il6*, *Il1b* and *Tnfa* expression ( $t_{(10)}=2.795$ ,  $P<0.05$ ;  $t_{(10)}=2.957$ ,  $P<0.05$  and  $t_{(10)}=2.535$ ,  $P<0.05$ , respectively). Regarding Sc-WAT, acute treatment only reduced the expression of *Il1b* ( $t_{(8)}=3.039$ ;  $P<0.05$ ) while chronic treatment reduced the expression of *Il6*, *Il1b* and *Tnfa* ( $t_{(10)}=9.312$ ,  $P<0.05$ ;  $t_{(10)}=3.028$ ,  $P<0.05$  and  $t_{(10)}=3.705$ ,  $P<0.05$ , respectively).

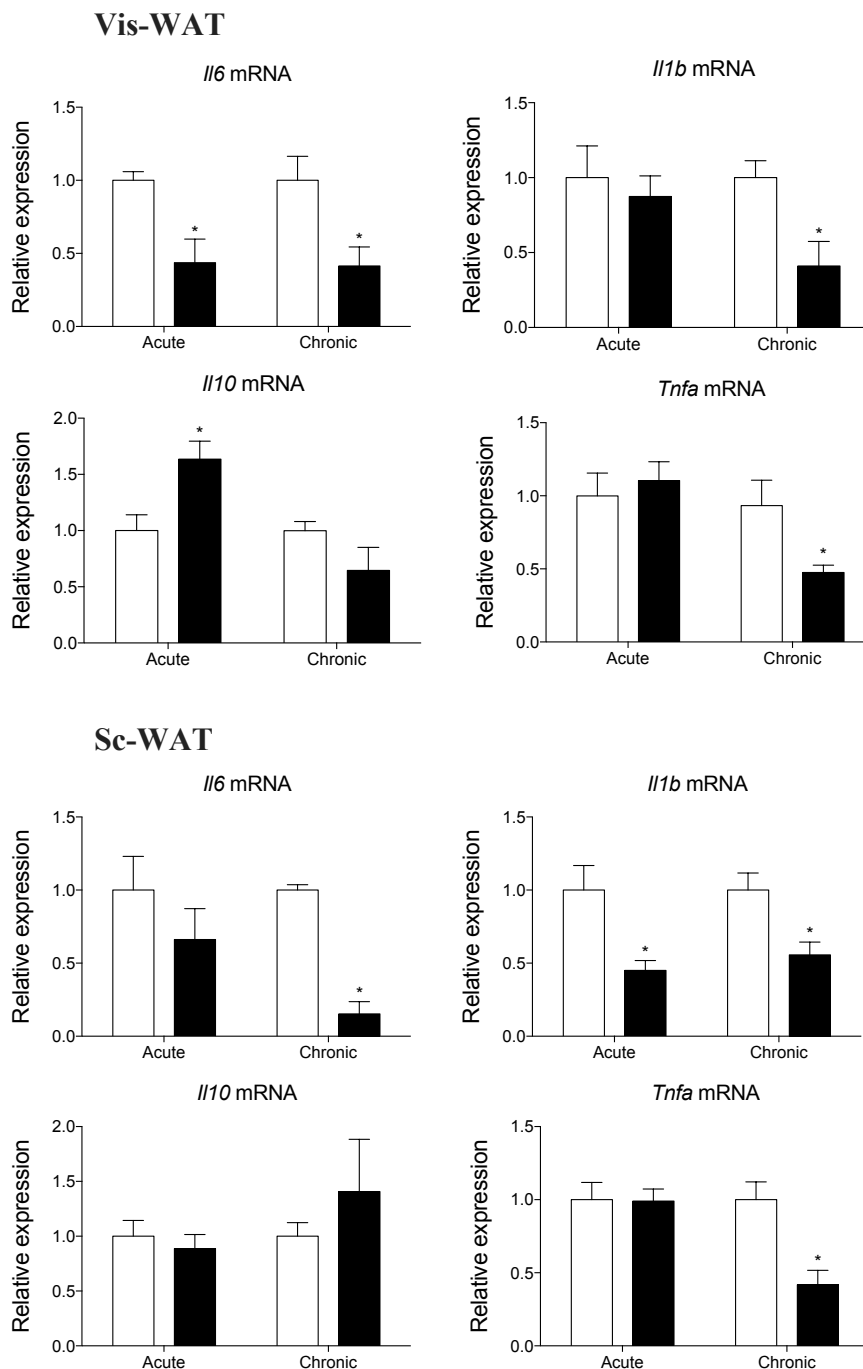

Supplement: BPH-176-2678-s001.pdf [file BPH-176-2678-s001.pdf]
